# Supplementary material
Source: PubMed Central journal article supplement (PMC7136035)
Supplement: NIHMS1563796-supplement-Supplementary_Fig_1.pdf [file NIHMS1563796-supplement-Supplementary_Fig_1.pdf]

Supplementary Table1.

Figure 1a

| Group | Number | Test Name        | Statistical summary |                              |
|-------|--------|------------------|---------------------|------------------------------|
| Sal   | 3      | Two-way RM ANOVA | Interaction         | F(6, 18) = 4.229, p = 0.0079 |
| 5     | 3      |                  | Time factor         | F(3, 18) = 16.64, p < 0.0001 |
| 50    | 3      |                  | Dose factor         | F(2, 6) = 0.5916, p = 0.5828 |

| Test Name                        | Group     | 0.5 hr     | 1 hr       | 1.5 hr     | 2 hr       |
|----------------------------------|-----------|------------|------------|------------|------------|
| Tukey's multiple comparison test | Sal vs 5  | p = 0.9894 | p = 0.6261 | p = 0.5026 | p = 0.9727 |
|                                  | Sal vs 50 | p = 0.0197 | p = 0.7532 | p = 0.848  | p = 0.8331 |
|                                  | 5 vs 50   | p = 0.0143 | p = 0.2436 | p = 0.8289 | p = 0.9336 |

Figure 1b

| Group | Number | Mean  | Std. Deviation | Std. Error |
|-------|--------|-------|----------------|------------|
| Sal   | 10     | 181.3 | 21.29          | 6.733      |
| Ket5  | 10     | 142.1 | 37.97          | 12.01      |
| Ket20 | 9      | 168.4 | 25.07          | 8.355      |
| Ket50 | 10     | 169.7 | 33.08          | 10.46      |

| Test Name     | Statistical summary          | Post-hoc test | Group           | p-value | significance |
|---------------|------------------------------|---------------|-----------------|---------|--------------|
| One-way ANOVA | F(3, 35) = 3.005, p = 0.0434 | Fisher's LSD  | Veh vs. Ket5    | 0.0064  | **           |
|               |                              |               | Veh vs. Ket20   | 0.3607  | ns           |
|               |                              |               | Veh vs. Ket50   | 0.3963  | ns           |
|               |                              |               | Ket5 vs. Ket20  | 0.0659  | ns           |
|               |                              |               | Ket5 vs. Ket50  | 0.0486  | *            |
|               |                              |               | Ket20 vs. Ket50 | 0.9284  | ns           |

**Figure 2b**  
**BDNF**

| Group   | Number | Mean   | Std. Deviation | Std. Error |
|---------|--------|--------|----------------|------------|
| Vehicle | 8      | 1      | 0.1658         | 0.05861    |
| Ket5    | 7      | 1.326  | 0.2959         | 0.1119     |
| Ket20   | 8      | 0.7591 | 0.1675         | 0.05922    |
| Ket50   | 8      | 0.7489 | 0.255          | 0.09015    |

| Test Name     | Statistical summary          | Post-hoc test | Group           | p-value | significance |
|---------------|------------------------------|---------------|-----------------|---------|--------------|
| One-way ANOVA | F(3, 27) = 10.67, p < 0.0001 | Fisher's LSD  | Veh vs. Ket5    | 0.0094  | **           |
|               |                              |               | Veh vs. Ket20   | 0.0416  | *            |
|               |                              |               | Veh vs. Ket50   | 0.0343  | *            |
|               |                              |               | Ket5 vs. Ket20  | <0.0001 | ***          |
|               |                              |               | Ket5 vs. Ket50  | <0.0001 | ***          |
|               |                              |               | Ket20 vs. Ket50 | 0.9284  | ns           |

**pS6K/S6K**

| Group   | Number | Mean  | Std. Deviation | Std. Error |
|---------|--------|-------|----------------|------------|
| Vehicle | 8      | 1     | 0.1274         | 0.04503    |
| Ket5    | 8      | 0.93  | 0.6481         | 0.2292     |
| Ket20   | 8      | 1.906 | 1.825          | 0.6453     |
| Ket50   | 8      | 2.322 | 1.928          | 0.6815     |

| Test Name     | Statistical summary          | Post-hoc test | Group           | p-value | significance |
|---------------|------------------------------|---------------|-----------------|---------|--------------|
| One-way ANOVA | F(3, 28) = 2.009, p = 0.1355 | Fisher's LSD  | Veh vs. Ket5    | 0.9192  | ns           |
|               |                              |               | Veh vs. Ket20   | 0.196   | ns           |
|               |                              |               | Veh vs. Ket50   | 0.0633  | ns           |
|               |                              |               | Ket5 vs. Ket20  | 0.1647  | ns           |
|               |                              |               | Ket5 vs. Ket50  | 0.0513  | ns           |
|               |                              |               | Ket20 vs. Ket50 | 0.5474  | ns           |

pGSK3β/GSK3β

| Group   | Number | Mean   | Std. Deviation | Std. Error |
|---------|--------|--------|----------------|------------|
| Vehicle | 8      | 1      | 0.3746         | 0.1324     |
| Ket5    | 8      | 0.8477 | 0.3043         | 0.1076     |
| Ket20   | 8      | 0.793  | 0.3458         | 0.1223     |
| Ket50   | 8      | 0.8867 | 0.2943         | 0.1041     |

| Test Name     | Statistical summary           | Post-hoc test | Group           | p-value | significance |
|---------------|-------------------------------|---------------|-----------------|---------|--------------|
| One-way ANOVA | F(3, 28) = 0.5598, p = 0.6430 | Fisher's LSD  | Veh vs. Ket5    | 0.3659  | ns           |
|               |                               |               | Veh vs. Ket20   | 0.2218  | ns           |
|               |                               |               | Veh vs. Ket50   | 0.4995  | ns           |
|               |                               |               | Ket5 vs. Ket20  | 0.7434  | ns           |
|               |                               |               | Ket5 vs. Ket50  | 0.816   | ns           |
|               |                               |               | Ket20 vs. Ket50 | 0.5762  | ns           |

Figure 3b

Potentiation magnitude

| Group | Number | Mean  | Std. Deviation | Std. Error |
|-------|--------|-------|----------------|------------|
| 20    | 7      | 1.285 | 0.1356         | 0.05126    |
| 50    | 7      | 1.127 | 0.0851         | 0.03009    |
| 100   | 6      | 1.03  | 0.07067        | 0.02671    |

| Test Name     | Statistical summary          | F-test (p-value) | Post-hoc test               | Group      | p-value | significance |
|---------------|------------------------------|------------------|-----------------------------|------------|---------|--------------|
| One-way ANOVA | F(2, 17) = 9.721, p = 0.0015 | 0.2865           | Tukey's multiple comparison | 20 vs. 50  | 0.0447  | *            |
|               |                              |                  |                             | 20 vs. 100 | 0.0012  | **           |
|               |                              |                  |                             | 50 vs. 100 | 0.1839  | ns           |

Figure 3c

Slope 20 uM

| Group  | Number | Mean  | Std. Deviation | Std. Error |
|--------|--------|-------|----------------|------------|
| Before | 7      | 4.377 | 1.276          | 0.4822     |
| After  | 7      | 5.446 | 1.414          | 0.5344     |

| Test Name     | Group           | Statistical summary      |
|---------------|-----------------|--------------------------|
| Paired t-test | Before vs After | t(6) = 5.359, p = 0.0017 |

Figure 3d

Slope 50 uM

| Group  | Number | Mean  | Std. Deviation | Std. Error |
|--------|--------|-------|----------------|------------|
| Before | 6      | 4.965 | 1.702          | 0.6948     |
| After  | 6      | 5.582 | 1.634          | 0.6673     |

| Test Name     | Group           | Statistical summary      |
|---------------|-----------------|--------------------------|
| Paired t-test | Before vs After | t(5) = 4.505, p = 0.0064 |

Figure 3e

Slope 100 uM

| Group  | Number | Mean  | Std. Deviation | Std. Error |
|--------|--------|-------|----------------|------------|
| Before | 6      | 6.528 | 2.241          | 0.9148     |
| After  | 6      | 7.218 | 2.571          | 1.05       |

| Test Name     | Group           | Statistical summary      |
|---------------|-----------------|--------------------------|
| Paired t-test | Before vs After | t(5) = 3.049, p = 0.0285 |

Figure 3f

Slope change

| Group | Number | Mean  | Std. Deviation | Std. Error |
|-------|--------|-------|----------------|------------|
| 20    | 7      | 1.257 | 0.1122         | 0.04241    |
| 50    | 6      | 1.144 | 0.09406        | 0.0384     |
| 100   | 6      | 1.102 | 0.07595        | 0.03101    |

| Test Name     | Statistical summary          | F-test (p-value) | Post-hoc test               | Group      | p-value | significance |
|---------------|------------------------------|------------------|-----------------------------|------------|---------|--------------|
| One-way ANOVA | F(2, 19) = 4.579, p = 0.0268 | 0.6912           | Tukey's multiple comparison | 20 vs. 50  | 0.1173  | ns           |
|               |                              |                  |                             | 20 vs. 100 | 0.027   | *            |
|               |                              |                  |                             | 50 vs. 100 | 0.7399  | ns           |

**Figure 4a**  
**20 uM**

| Interstimulus interval | Group  | N number | Mean  | Std. Deviation | Std. Error | Test Name     | Statistical summary       |
|------------------------|--------|----------|-------|----------------|------------|---------------|---------------------------|
| 20                     | before | 7        | 1.468 | 0.09467        | 0.03578    | paired t-test | t(6) = 1.357, p = 0.2236  |
|                        | after  | 7        | 1.422 | 0.1704         | 0.06442    |               |                           |
| 30                     | before | 7        | 1.571 | 0.1131         | 0.04276    | paired t-test | t(6) = 1.777, p = 0.1259  |
|                        | after  | 7        | 1.472 | 0.1232         | 0.04658    |               |                           |
| 50                     | before | 7        | 1.526 | 0.153          | 0.05782    | paired t-test | t(6) = 0.2163, p = 0.8359 |
|                        | after  | 7        | 1.536 | 0.1103         | 0.0417     |               |                           |
| 100                    | before | 7        | 1.487 | 0.1369         | 0.05174    | Wilcoxon test | p > 0.9999                |
|                        | after  | 7        | 1.491 | 0.1244         | 0.04701    |               |                           |
| 200                    | before | 7        | 1.325 | 0.07107        | 0.02686    | Wilcoxon test | p = 0.4688                |
|                        | after  | 7        | 1.297 | 0.1094         | 0.04135    |               |                           |
| 400                    | before | 7        | 1.116 | 0.09069        | 0.03428    | paired t-test | t(6) = 1.282, p = 0.2473  |
|                        | after  | 7        | 1.169 | 0.1008         | 0.03811    |               |                           |
| 500                    | before | 7        | 1.051 | 0.07858        | 0.0297     | paired t-test | t(6) = 0.3470, p = 0.7404 |
|                        | after  | 7        | 1.089 | 0.06308        | 0.02384    |               |                           |

**Figure 4b**  
**50 uM**

| Interstimulus interval | Group  | N number | Mean  | Std. Deviation | Std. Error | Test Name     | Statistical summary       |
|------------------------|--------|----------|-------|----------------|------------|---------------|---------------------------|
| 20                     | before | 6        | 1.327 | 0.1079         | 0.04407    | paired t-test | t(5) = 1.367, p = 0.2298  |
|                        | after  | 6        | 1.382 | 0.1471         | 0.06004    |               |                           |
| 30                     | before | 6        | 1.453 | 0.08065        | 0.03293    | paired t-test | t(5) = 0.4667, p = 0.6603 |
|                        | after  | 6        | 1.418 | 0.1413         | 0.05769    |               |                           |
| 50                     | before | 6        | 1.506 | 0.0597         | 0.02437    | paired t-test | t(5) = 0.5600, p = 0.5996 |
|                        | after  | 6        | 1.49  | 0.07815        | 0.03191    |               |                           |
| 100                    | before | 6        | 1.464 | 0.1429         | 0.05833    | paired t-test | t(5) = 0.0477, p = 0.9638 |
|                        | after  | 6        | 1.461 | 0.03398        | 0.01387    |               |                           |
| 200                    | before | 6        | 1.264 | 0.07279        | 0.02972    | paired t-test | t(5) = 1.064, p = 0.3358  |
|                        | after  | 6        | 1.225 | 0.06929        | 0.02829    |               |                           |
| 400                    | before | 6        | 1.067 | 0.1126         | 0.04599    | paired t-test | t(5) = 0.2980, p = 0.7777 |
|                        | after  | 6        | 1.077 | 0.0781         | 0.03189    |               |                           |
| 500                    | before | 6        | 1.047 | 0.05271        | 0.02152    | paired t-test | t(5) = 1.390, p = 0.2233  |
|                        | after  | 6        | 1.084 | 0.08187        | 0.03342    |               |                           |

**Figure 4c**  
**100 uM**

| Interstimulus interval | Group  | N number | Mean  | Std. Deviation | Std. Error | Test Name     | Statistical summary       |
|------------------------|--------|----------|-------|----------------|------------|---------------|---------------------------|
| 20                     | before | 6        | 1.435 | 0.115          | 0.04066    | paired t-test | t(5) = 2.099, p = 0.0899  |
|                        | after  | 6        | 1.356 | 0.1212         | 0.04286    |               |                           |
| 30                     | before | 6        | 1.451 | 0.146          | 0.0516     | paired t-test | t(5) = 0.4123, p = 0.6972 |
|                        | after  | 6        | 1.446 | 0.07146        | 0.02526    |               |                           |
| 50                     | before | 6        | 1.494 | 0.1079         | 0.03814    | paired t-test | t(5) = 0.9466, p = 0.3873 |
|                        | after  | 6        | 1.58  | 0.2006         | 0.07092    |               |                           |
| 100                    | before | 6        | 1.468 | 0.1342         | 0.04744    | paired t-test | t(5) = 0.6361, p = 0.5527 |
|                        | after  | 6        | 1.495 | 0.1342         | 0.04746    |               |                           |
| 200                    | before | 6        | 1.313 | 0.1551         | 0.05484    | paired t-test | t(5) = 0.5997, p = 0.5749 |
|                        | after  | 6        | 1.338 | 0.1644         | 0.05812    |               |                           |
| 400                    | before | 6        | 1.082 | 0.07235        | 0.02558    | paired t-test | t(5) = 0.1988, p = 0.8503 |
|                        | after  | 6        | 1.082 | 0.1079         | 0.03814    |               |                           |
| 500                    | before | 6        | 1.119 | 0.08477        | 0.02997    | paired t-test | t(5) = 0.7397, p = 0.4928 |
|                        | after  | 6        | 1.077 | 0.05207        | 0.01841    |               |                           |
